# Supplementary material for: The Big Three diagnostic errors through reflections of Japanese internists
Source: publisher site journal article supplement (doi:10.1515/dx-2023-0131), 2024-03-19
Supplement: Supplementary file 1 [file j_dx-2023-0131_suppl_002.docx]

**Supplementary File 1.** Ten representative cognitive biases shared with participants.

| **Cognitive biases** | **Explanation** |
| --- | --- |
| Availability bias | Instinctively thinking of things that come to mind easily and believing that these are the best explanation or diagnosis. This may also be affected by one’s recent experiences. |
| Overconfidence bias | Easily believing overconfident people’s judgments about oneself and others. |
| Anchoring bias | Clinging on to the first piece of information presented or your first thought and not considering other possibilities. |
| Confirmation bias | Disregarding information that is inconsistent with one’s assumptions. |
| Hassle bias | Choosing options that we physically and mentally process with ease. |
| Rule bias | You blindly follow general rules that are not always correct. |
| Base rate neglect | Ignoring the frequency of a disease; sometimes, diagnosing a rare disease accelerates this even further. |
| Visceral bias | Decisions being influences by one’s positive or negative feelings about the patient. |
| Premature closure | Ceasing to think about an issue further after making a diagnosis. This is a strong bias that may contribute most to errors. |
| Maslow’s hammer | Preferring to use the most familiar tool or technique available rather than the most effective one (e.g., endoscopy and cardiac catheterization). |
